# Supplementary material
Source: HighWire-hosted journal article supplement (https://tobaccocontrol.bmj.com/content/32/e1/e95)
Supplement: inline-supplementary-material-1 [file inline-supplementary-material-1.pdf]

Systematic review of sensory methods to evaluate perception of flavors in tobacco and other nicotine-containing products

Bernat JK<sup>1</sup>; Jackson KJ<sup>1</sup>, Krüsemann, EJZ<sup>2,3</sup>; Boesveldt, S<sup>3</sup>; Rudy S<sup>1</sup>; Talhout, R<sup>2</sup>

<sup>1</sup>U.S. Food and Drug Administration, Office of Science, Silver Spring, MD, USA; <sup>2</sup>Centre for Health Protection, National Institute for Public Health and the Environment (RIVM), Bilthoven, The Netherlands;

<sup>3</sup>Division of Human Nutrition and Health, Wageningen University, Wageningen, The Netherlands

**Supplemental Material : Database Search Strings**

Completed searches 5/13/2019 and 5/22/2020

**PUBMED**

(((((("tobacco"[MeSH Terms]) OR "tobacco products"[MeSH Terms]) OR "electronic nicotine delivery systems"[MeSH Terms]) OR "tobacco industry"[MeSH Terms])) OR  
 (((((((((((((((("cigarette"[Title/Abstract]) OR "e cigarette"[Title/Abstract]) OR "electronic cigarette"[Title/Abstract]) OR "electronic nicotine delivery"[Title/Abstract]) OR "e liquid"[Title/Abstract]) OR "cigar") OR "cigarillo"[Title/Abstract]) OR "little cigar"[Title/Abstract]) OR "hookah"[Title/Abstract]) OR "smokeless tobacco"[Title/Abstract]) OR "chew tobacco"[Title/Abstract]) OR "oral tobacco"[Title/Abstract]) OR "snuff tobacco"[Title/Abstract]) OR "pipe tobacco"[Title/Abstract]) OR "dissolvable tobacco"[Title/Abstract]) OR "nicotine"[Title/Abstract]))) OR "snus"[Title/Abstract])) AND  
 (((((((((((("flavoring agents"[MeSH Terms]) OR "sweetening agents"[MeSH Terms]) OR "flavor"[Title/Abstract]) OR "flavor/aroma"[Title/Abstract]) OR "flavor/odor"[Title/Abstract]) OR "flavour"[Title/Abstract]) OR "flavour/aroma"[Title/Abstract]) OR "flavour/odour"[Title/Abstract]) OR ("flavourant"[Title/Abstract]) OR "flavourants"[Title/Abstract])) OR "odorant"[Title/Abstract]) OR "odourant"[Title/Abstract]) OR "taste"[Title/Abstract]) OR ("taste/aroma"[Title/Abstract]) OR "taste/flavor"[Title/Abstract]) OR "taste/flavor/smell"[Title/Abstract]) OR "taste/flavors"[Title/Abstract]) OR "taste/flavour"[Title/Abstract]) OR "taste/odor"[Title/Abstract]) OR "taste/odour"[Title/Abstract])) OR "chemesthesis"[Title/Abstract])) AND ((("sensory"[Title/Abstract]) OR "chemosensory"[Title/Abstract]) AND ((evaluat\* OR test OR tests OR panel OR detection OR method OR methods OR methodology)))) NOT (((("rat"[Title/Abstract]) OR "rats"[Title/Abstract]) OR "mouse"[Title/Abstract]) OR "mice"[Title/Abstract])

**EMBASE**

'tobacco'/exp OR 'tobacco industry'/exp OR cigarette:ab,ti OR 'electronic cigarette':ab,ti OR 'e liquid':ab,ti OR cigar:ab,ti OR cigarillo:ab,ti OR 'little cigar':ab,ti OR hookah:ab,ti OR 'waterpipe tobacco':ab,ti OR 'smokeless tobacco':ab,ti OR 'chewing tobacco':ab,ti OR snus:ab,ti OR 'tobacco snuff':ab,ti OR 'pipe tobacco':ab,ti OR 'dissolvable tobacco':ab,ti OR nicotine:ab,ti

AND

flavor:ab,ti OR 'flavoring agent':ab,ti OR 'sweetening agent':ab,ti OR 'aromatic compound':ab,ti OR

odor:ab,ti OR chemesthesis:ab,ti

AND

(sensory:ab,ti OR chemosensory:ab,ti) AND ('evaluation study':ab,ti OR 'panel study':ab,ti OR detection:ab,ti OR procedures:ab,ti OR test\*:ab,ti)

NOT

(rat:ab,ti OR rats:ab,ti OR mice:ab,ti OR mouse:ab,ti)

### **WEB OF SCIENCE**

(TS=("Cigarette\*" OR "Electronic Cigarette\*" OR "electronic nicotine delivery systems" OR "E-cigarette\*" OR "e-cigs" OR "E-liquid" OR "e-juice" OR "tobacco heating system" OR "waterpipe" OR "hookah" OR "cigar\*" OR "smokeless tobacco" OR "snuff" OR "snus" OR "chew\* tobacco" OR "oral tobacco" OR "pipe\*" OR "dissolvable\*") AND ("tobacco" OR "nicotine")) NOT TS=("rat\*" OR "mice" OR "mouse"))

AND

(TS=("Flavoring Agents" OR "Sweetening Agents" OR "taste" OR "flavor\*" OR "aroma" OR "odor\*" OR "chemesthesis"))

AND

(TS=(("Sensory" OR "chemosensory") AND ("evaluat\*" OR "panel\*" OR "detect\*" OR "analysis" OR "method\*"))))
